# Supplementary material for: Electrochemical Digitization of Biological Fluids Samples
Source: MDPI journal article supplement (doi:10.3390/electrochem3040043), 2022-10-09
Supplement: s1 [file s1]

Archive with 2 entries (2 files):
- electrochem-1867261-supplementary-Video S1.mp4
- Our Technology.pdf
